# Supplementary material
Source: PubMed Central journal article supplement (PMC7875198)
Supplement: NIHMS1662211-supplement-Nelson_supplementary.pdf [file NIHMS1662211-supplement-Nelson_supplementary.pdf]

1

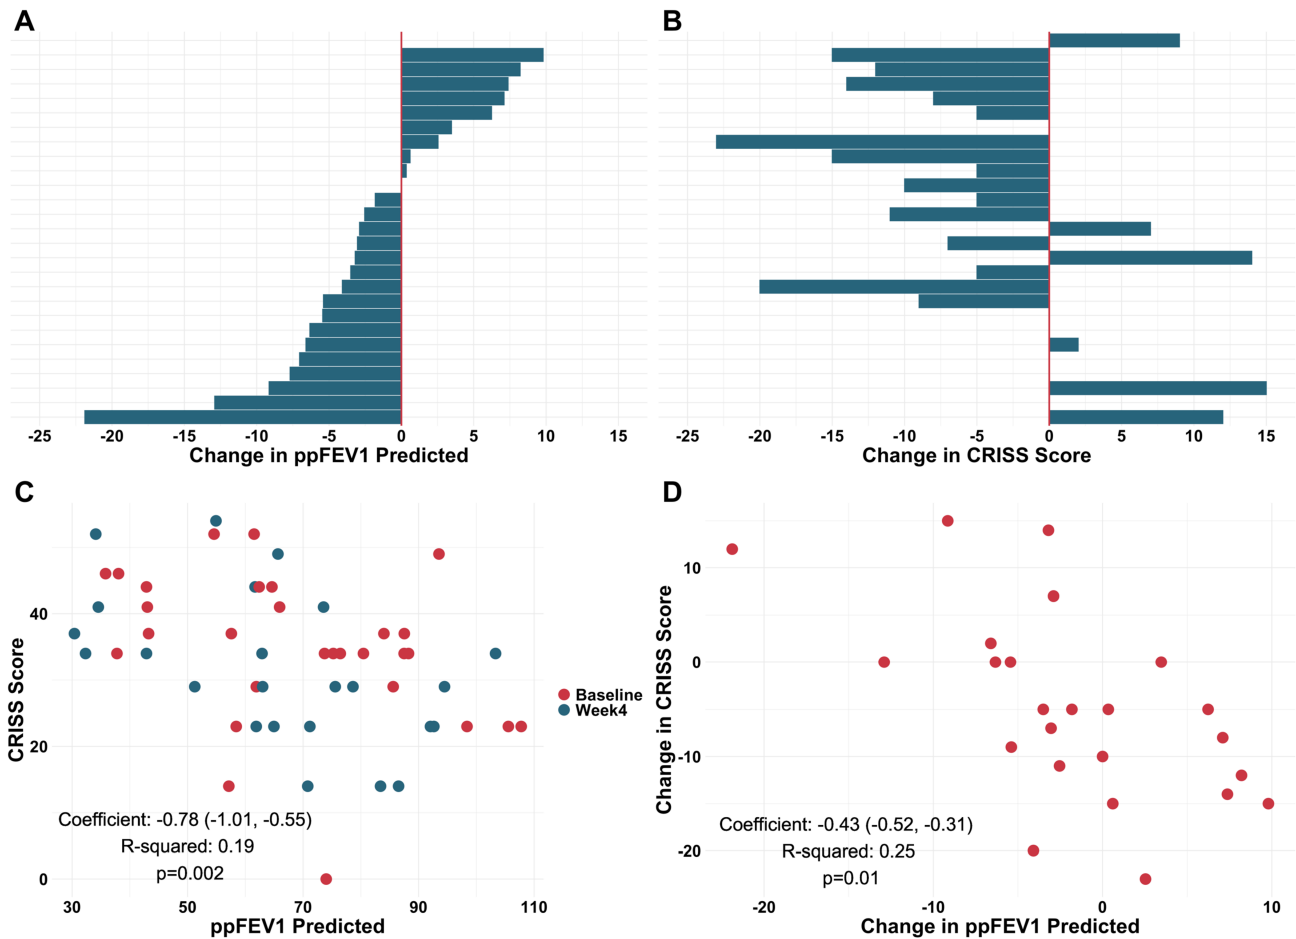

2

3 **Figure S1. Therapeutic response to one month of maintenance tobramycin therapy.** ppFEV<sub>1</sub> and  
 4 symptom scores (CRISS) were collected from all participants at baseline and after one month of inhaled  
 5 tobramycin. Change in ppFEV<sub>1</sub> (A) and CRISS score (B) after one month of therapy is presented for each  
 6 subject. Each horizontally aligned bar represents the same individual in both A and B. Positive numbers in (A)  
 7 indicate improvements in lung function, while negative numbers in (B) represent improvements in symptoms.  
 8 (C) Scatter plot comparing ppFEV<sub>1</sub> and CRISS score for each individual at baseline and at Week 4. (D) Scatter  
 9 plot of changes in CRISS score and ppFEV<sub>1</sub>. R<sup>2</sup> and p values result from linear regression analysis, controlling  
 0 for week on therapy in 1C. As a comparison, a common estimate of repeatability of standard spirometry is ~6  
 1 ppFEV<sub>1</sub> [1], and pulmonary exacerbations frequently involve a reduction of ≥10 ppFEV<sub>1</sub> [2], while a change in  
 2 CRISS score of 16 has been found to indicate a CF respiratory exacerbation.

3

4

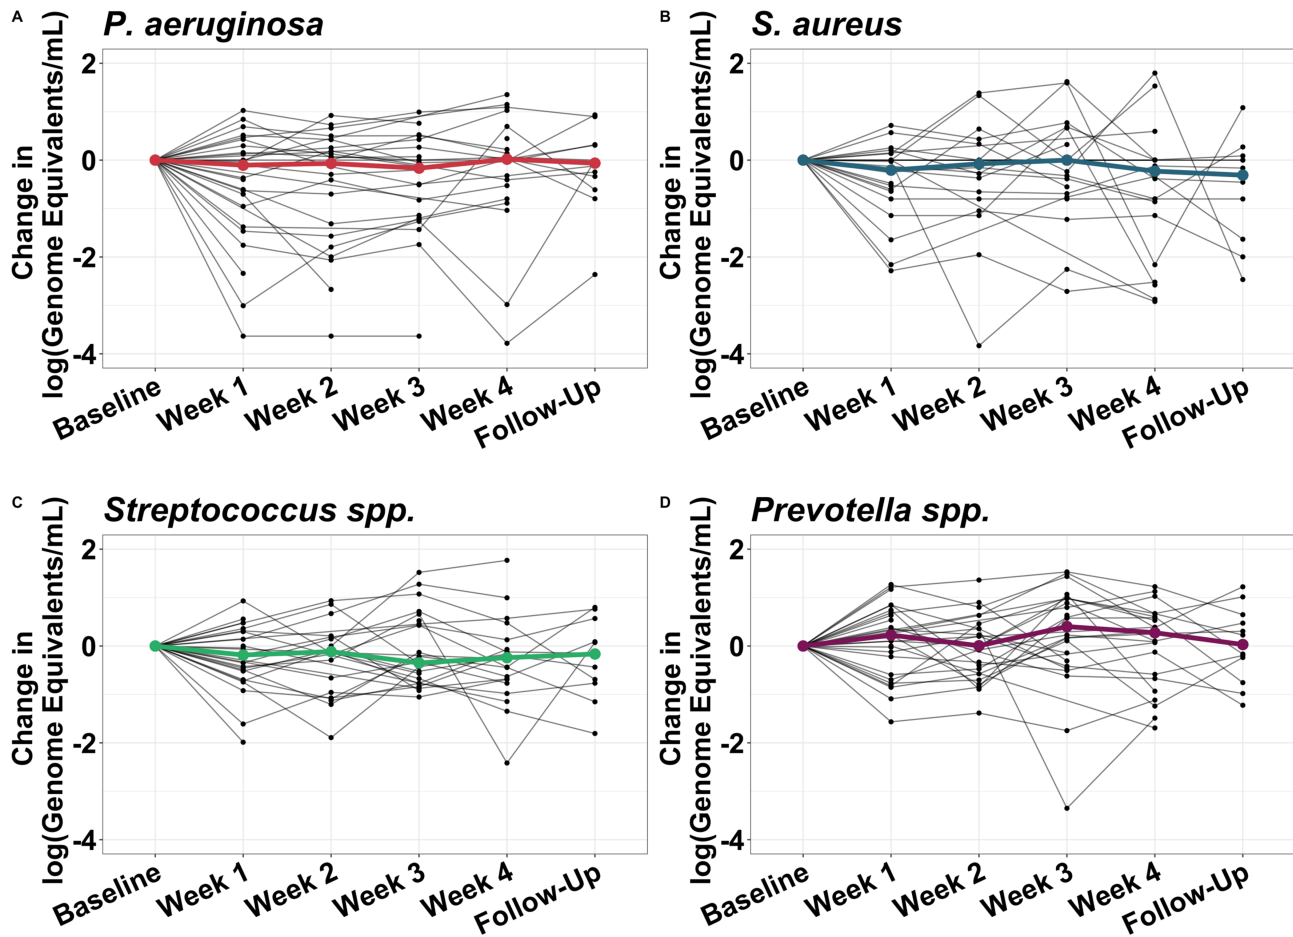

5

6 **Figure S2. Change in absolute viable load of select taxa by quantitative PCR.** Change in absolute load of  
7 *P. aeruginosa* (A), *S. aureus* (B), *Streptococcus spp.* (C) and *Prevotella spp.* from baseline by week on  
8 therapy. Each black line represents a single individual and the colored lines represent the median at each time  
9 point. Loads were calculated using a quadruplex quantitative PCR assay and were performed after removal of  
0 extracellular DNA from dead cells.

1

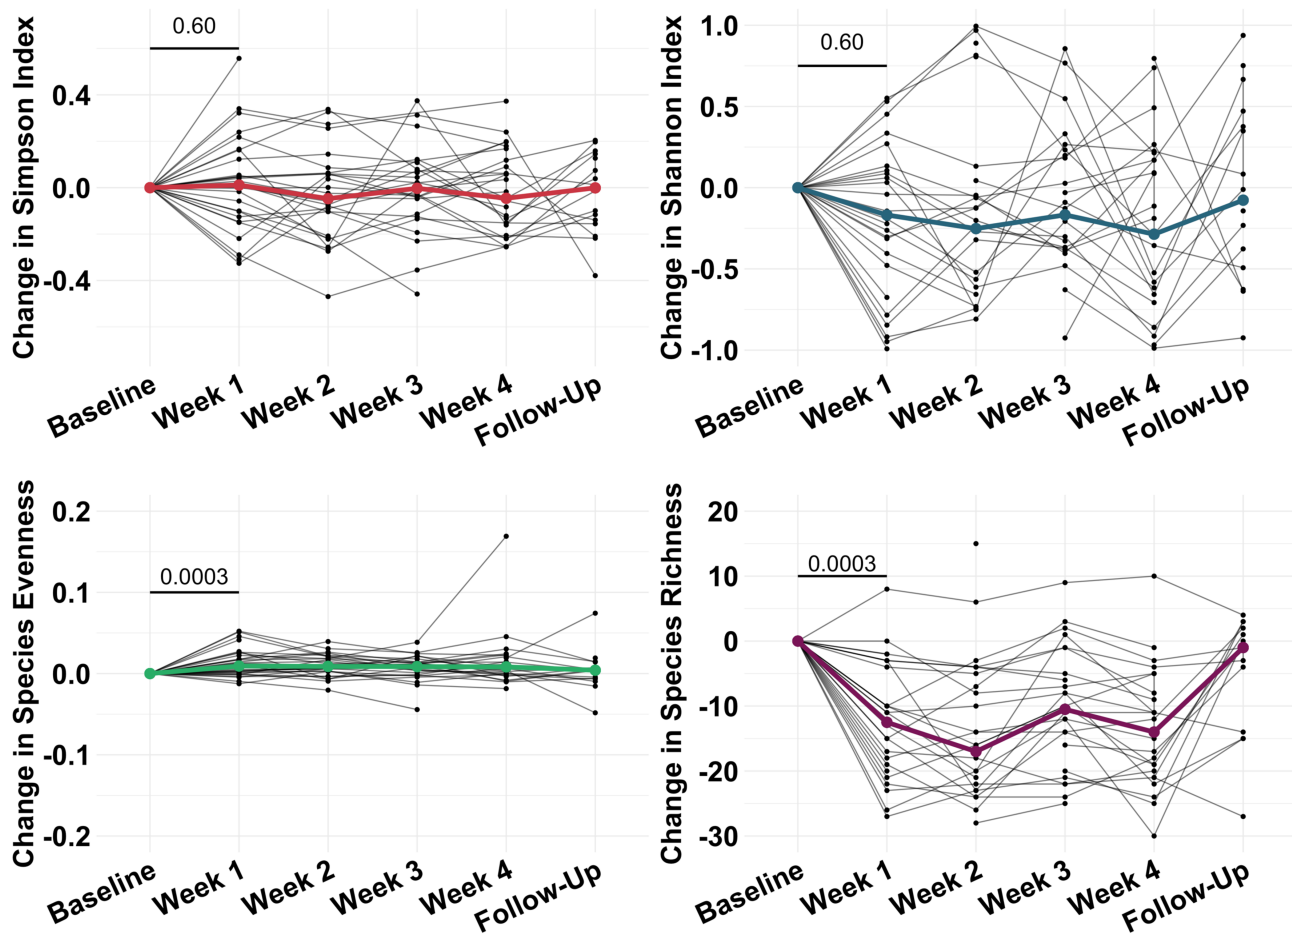

2  
3  
4  
5  
6  
7  
8  
9

**Figure S3. Diversity metrics of all samples by week on therapy.** Change in Simpson index (A), Shannon index (B), evenness (C) and Richness (D) by week on therapy. Each black line represents a single individual and colored lines represents the median value. All values were calculated at the species level. Wilcoxon signed rank test was used to assess difference between groups.





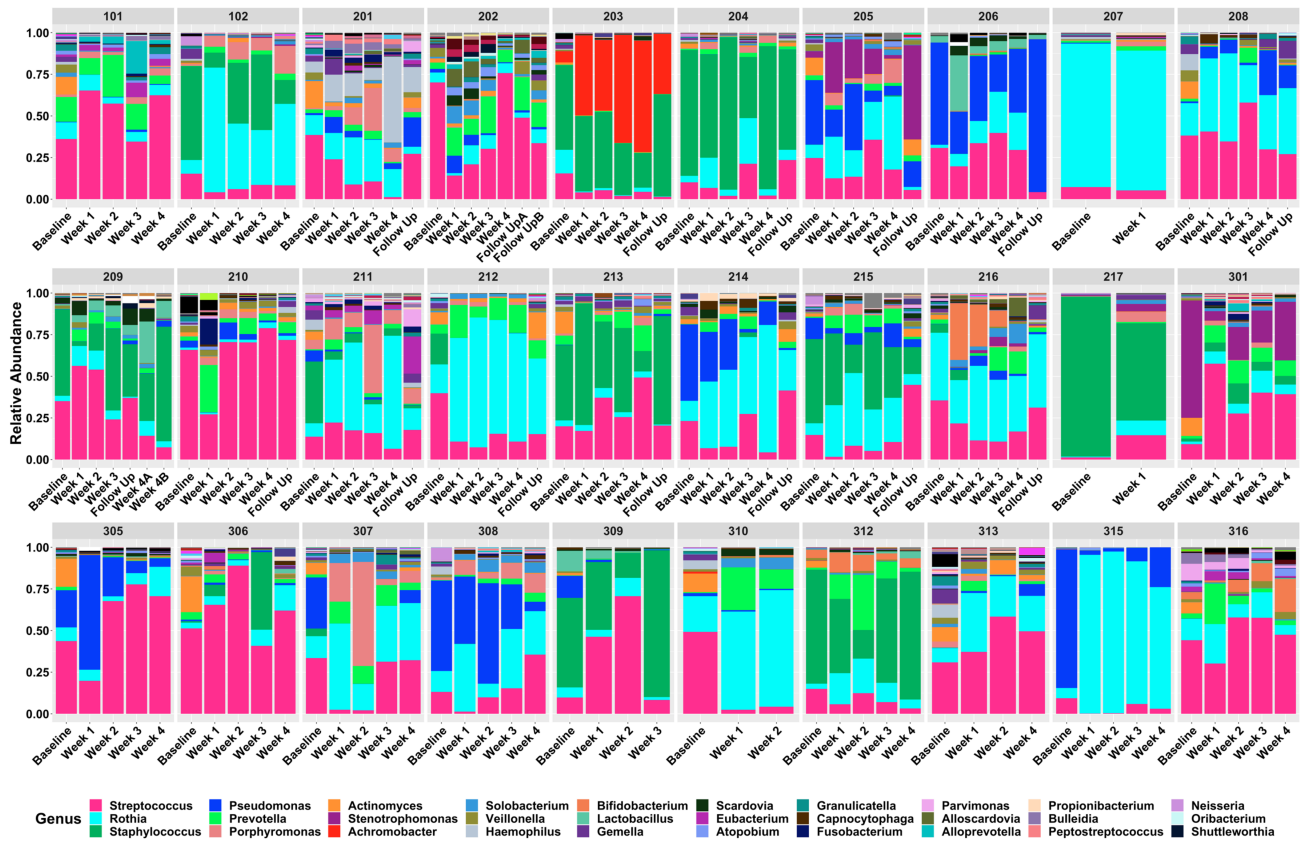

5  
6  
7  
8  
9  
0  
1  
2  
3

**Figure S5. Taxonomic profile of all samples at the genus level.** All samples were subjected to metagenomic shotgun sequencing followed and taxonomy was determined using MetaPhlan2. Reads from the same genus were summed before plotting profiles for all samples, separated by individual. Each color represents a different species. Two subjects (202 and 209) provided an extra sample at specific weeks, which are designated “A” and “B” here.

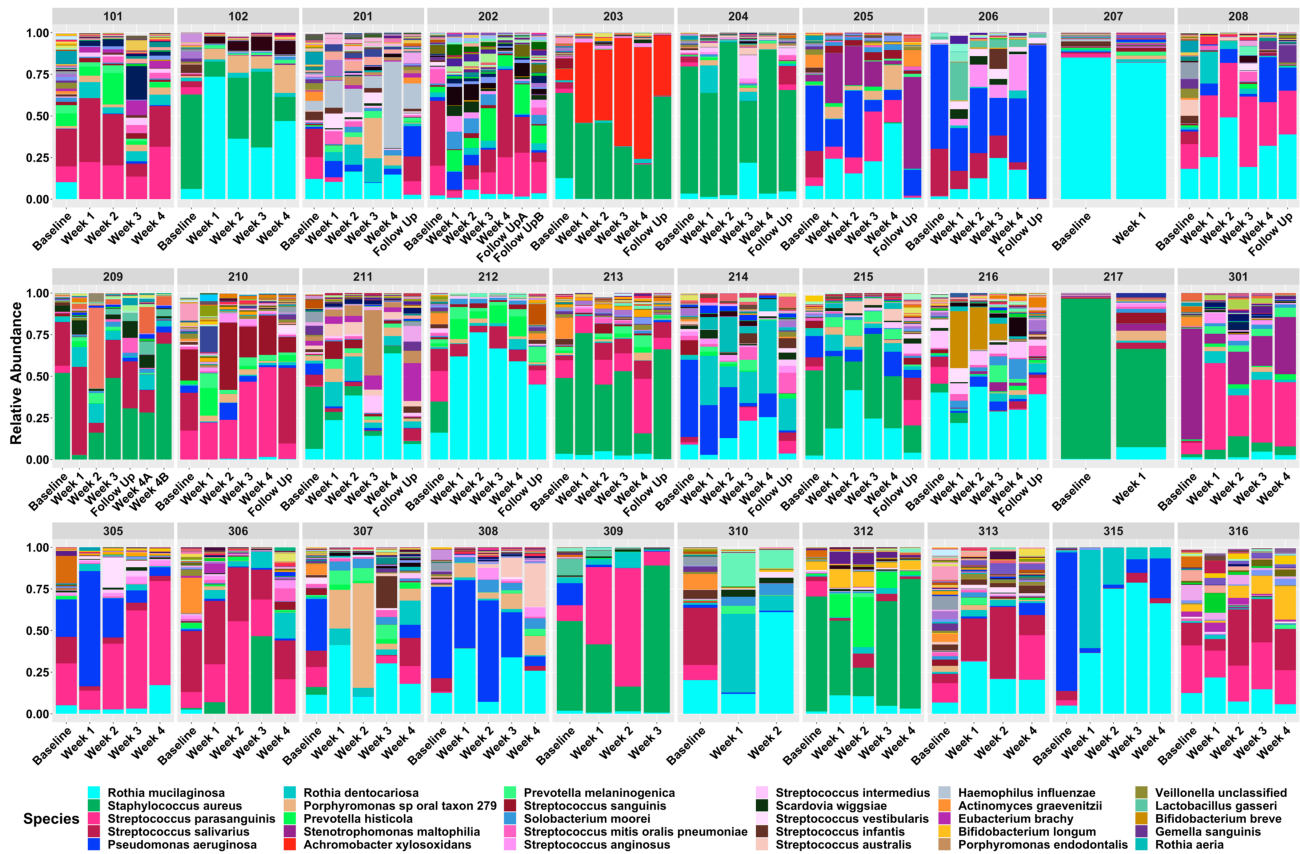

4  
 5 **Figure S6. Taxonomic profile of all samples at the species level.** All samples were subjected to  
 6 metagenomic shotgun sequencing followed and taxonomy was determined using MetaPhlan2. Reads from the  
 7 same species were summed before plotting profiles for all samples, separated by individual. Each color  
 8 represents a different species. Two subjects (202 and 209) provided an extra sample at specific weeks, which  
 9 are designated “A” and “B” here. Species names for most abundant 15 taxa are presented for ease of viewing.  
 0

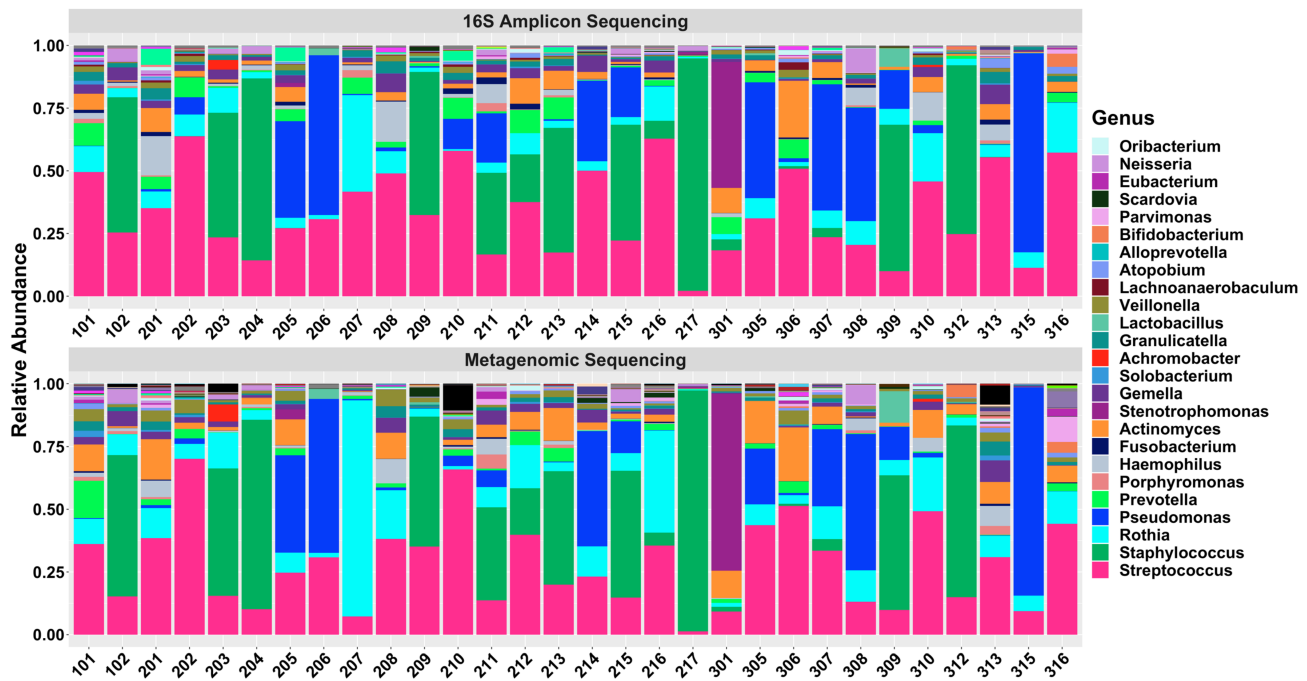

1  
2  
3  
4  
5  
6  
7  
8

**Figure S7. Comparison of taxonomic profiles analyzed via metagenomic shotgun sequencing vs. 16S amplicon sequencing.** Taxonomic profiles of all 30 baseline samples at the genus level, determined using metagenomic shotgun sequencing (top) or 16S amplicon sequencing (bottom). Vertically aligned bars represent the same sample. Note that 16S amplicon sequencing does not reliably identify taxa at the species level, so only genera are displayed.

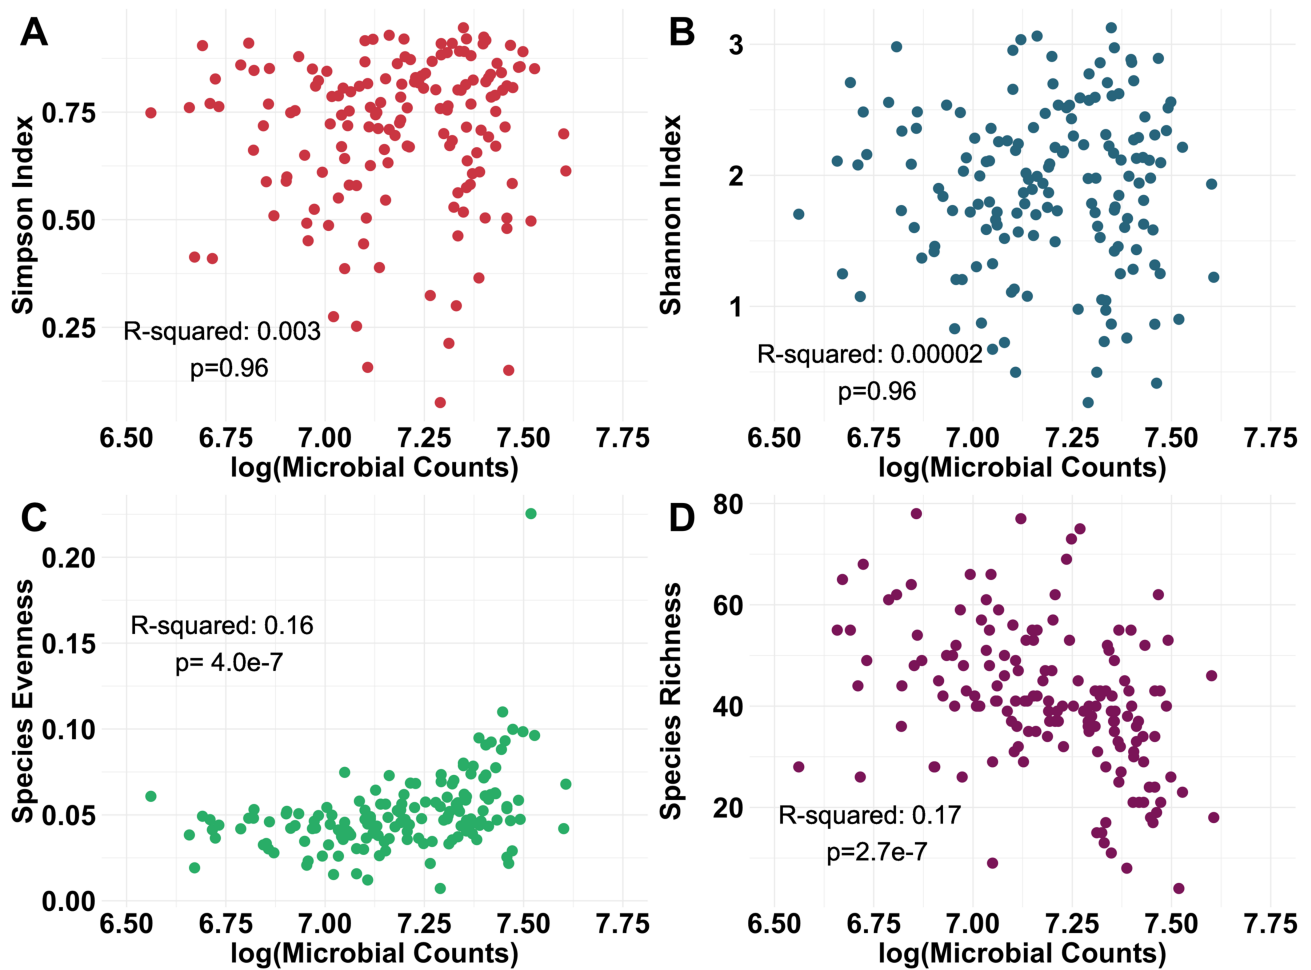

9  
0  
1  
2  
3  
4  
5  
6

**Figure S8. The effect of microbial sequencing depth on community diversity.** Dot plots comparing log microbial reads and Simpson index (A), Shannon index (B), evenness (C) and richness (D). Note that microbial reads, rather than total reads, are presented as percent human DNA differed between samples.  $R^2$  and p values result from linear regression analysis. A Benjamini-Hochberg correction performed to account for multiple comparisons.

**A**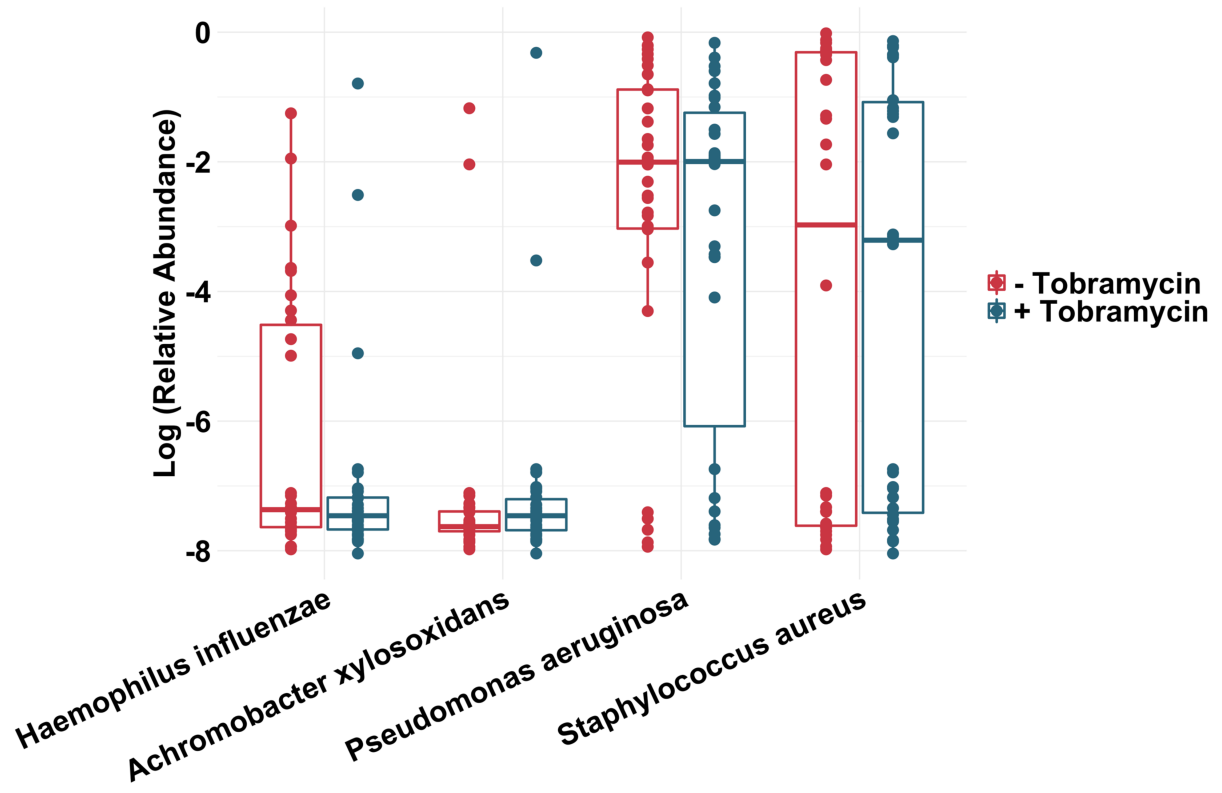**B**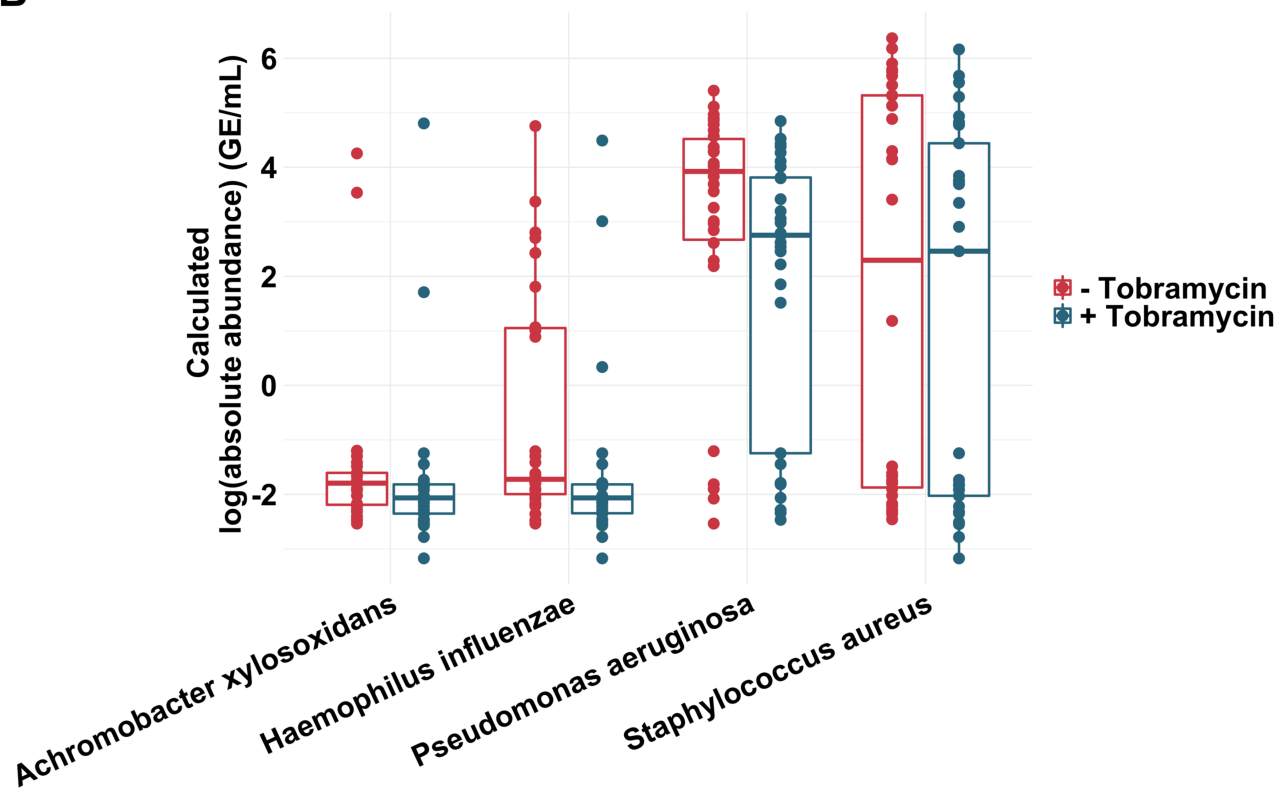

8

9 **Figure S9. Change in relative abundance of classic CF pathogens after one week of tobramycin**  
 0 **therapy.** A) Log-relative abundances and B) calculated absolute abundances of classic CF pathogens after  
 1 one week of tobramycin therapy. Absolute abundances were calculated by multiplying relative abundances via  
 2 MetaPhlan2 by total bacterial loads as determined via universal 16S qPCR. Compare to Fig. 3c-d. Boxes  
 3 represent interquartile region and middle represents the median.  
 4

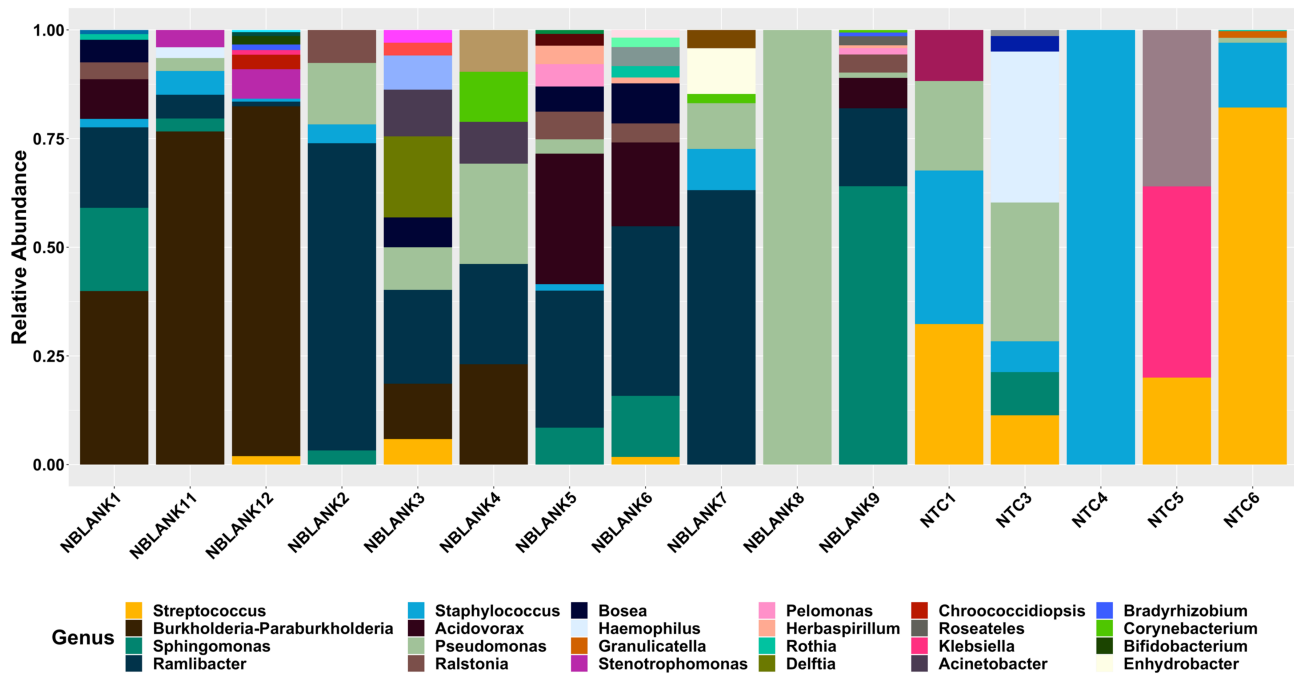

5

6 **Figure S10. Phylogenetic profile of extraction blanks and 16S amplicon PCR no-template-controls.**

7 Extraction blanks (NBLANK) and no template controls (NTC) produced an average of 526 reads and 126 reads  
 8 on average. NTC2 did not produce any reads and thus is not displayed.  
 9

| Category                  | Characteristic                           | Number of subjects (%)* |
|---------------------------|------------------------------------------|-------------------------|
| Study site                | Seattle Children's Hospital              | 2 (7)                   |
|                           | University of Washington                 | 17 (56)                 |
|                           | University of Michigan                   | 11 (37)                 |
| Mean age in years (range) |                                          | 35 (9-75)               |
| Gender                    | Female                                   | 16 (53)                 |
|                           | Male                                     | 14 (47)                 |
| Genotype                  | Homozygous F508del                       | 12 (40)                 |
|                           | Heterozygous F508del                     | 16 (53)                 |
|                           | Other                                    | 2 (7)                   |
| Clinical characteristics  | Mean Baseline ppFEV <sub>1</sub> (range) | 69.1 (35.8 – 107.8)     |

|                                                     |                                         |             |    |
|-----------------------------------------------------|-----------------------------------------|-------------|----|
|                                                     | Mean Baseline CRISS Score (range)       | 34 (0 – 52) | 90 |
| <b>Medical History</b>                              |                                         |             |    |
|                                                     | Impaired glucose tolerance <sup>#</sup> | 9 (30)      |    |
|                                                     | Liver dysfunction <sup>§</sup>          | 2 (7)       |    |
|                                                     | Allergic bronchopulmonary aspergillosis | 1 (3)       |    |
|                                                     | Gastroesophageal reflux                 | 3 (10)      |    |
|                                                     | Asthma                                  | 2 (7)       |    |
| <b>Culture History (one year prior to baseline)</b> |                                         |             |    |
|                                                     | <i>Pseudomonas aeruginosa</i>           | 30 (100)    |    |
|                                                     | <i>Staphylococcus aureus</i> , MSSA     | 15 (50)     |    |
|                                                     | <i>Staphylococcus aureus</i> , MRSA     | 2 (7)       |    |
|                                                     | <i>Burkholderia cepacia</i> complex     | 1 (3)       |    |
|                                                     | <i>Haemophilus influenzae</i>           | 1 (3)       |    |
|                                                     | <i>Stenotrophomonas maltophilia</i>     | 5 (17)      |    |
|                                                     | <i>Achromobacter xylosoxidans</i>       | 1 (3)       |    |
|                                                     | Nontuberculous <i>Mycobacterium</i>     | 2 (7)       |    |
|                                                     | <i>Candida</i> spp.                     | 4 (13)      |    |
|                                                     | <i>Aspergillus</i> spp.                 | 10 (33)     |    |
| <b>Other medications</b>                            |                                         |             |    |
|                                                     | Azithromycin                            | 19 (64)     |    |
|                                                     | Inhaled DNase                           | 23 (77)     |    |
|                                                     | Hypertonic saline                       | 13 (43)     |    |
|                                                     | Bronchodilators                         | 28 (93)     |    |
|                                                     | CFTR modulators                         | 8 (27)      |    |

1 Includes history of abnormal liver function tests

2 \* Unless otherwise noted in the "Characteristic" column

3 # Includes any history of impaired glucose tolerance, including CF-related diabetes.

4

5 **Table S1. Subject demographic table.** Aggregate data for select clinical characteristics for all study  
6 participants.

7

8 **File S1. Low abundance taxa.** Those taxa less than 1% relative abundance in all samples, pooled into the  
9 "other" category for both metagenomic sequencing (left column) and 16S amplicon sequencing (right column)

0

#### MetaPhlan2

*Achromobacter unclassified*

*Acinetobacter pittii calcoaceticus nosocomialis*

*Actinobacillus unclassified*

*Actinobaculum unclassified*

*Actinomyces georgiae*

*Actinomyces oris*

*Actinomyces sp oral taxon 171*

*Actinomyces sp oral taxon 448*

#### 16S Amplicon Sequencing

*Acidovorax*

*Acinetobacter*

*Actinobaculum*

*Actinomycetospora*

*Aerococcus*

*Afipia*

*Aggregatibacter*

*Alcanivorax*

*Actinomyces sp ph3*  
*Actinomyces timonensis*  
*Actinomyces viscosus*  
*Afipia unclassified*  
*Aggregatibacter aphrophilus*  
*Aggregatibacter unclassified*  
*Alloprevotella rava*  
*Alloprevotella unclassified*  
*Anaerococcus lactolyticus*  
*Anaerococcus obesiensis*  
*Anaerococcus sp PH9*  
*Anaeroglobus geminatus*  
*Aspergillus terreus*  
*Bacteroides fragilis*  
*Bilophila unclassified*  
*Bilophila wadsworthia*  
*Brevibacterium unclassified*  
*Burkholderia cenocepacia*  
*Burkholderia lata*  
*Burkholderia multivorans*  
*Burkholderia unclassified*  
*C2likevirus unclassified*  
*Campylobacter concisus*  
*Campylobacter gracilis*  
*Campylobacter rectus*  
*Campylobacter showae*  
*Candida unclassified*  
*candidate division TM7 single cell isolate TM7b*  
*candidate division TM7 single cell isolate TM7c*  
*Candidatus Prevotella conceptionensis*  
*Capnocytophaga granulosa*  
*Capnocytophaga ochracea*  
*Capnocytophaga sp oral taxon 338*  
*Cardiobacterium hominis*  
*Cardiobacterium valvarum*  
*Catonella morbi*  
*Clavispora lusitaniae*  
*Collinsella unclassified*  
*Comamonas unclassified*  
*Corynebacterium accolens*  
*Corynebacterium matruchotii*  
*Cryptobacterium curtum*  
*Deinococcus unclassified*  
*Anaeroglobus*  
*Anoxybacillus*  
*Arsenicococcus*  
*Aspergillus*  
*Bergeyella*  
*Bilophila*  
*Blautia*  
*Bordetella*  
*Bosea*  
*Bradyrhizobium*  
*Brevundimonas*  
*Brochothrix*  
*Burkholderia-Paraburkholderia*  
*Butyrivibrio*  
*Caenimonas*  
*Campylobacter*  
*Candidatus\_Saccharimonas*  
*Cardiobacterium*  
*Catonella*  
*Centipeda*  
*Chroococciopsis*  
*Chryseobacterium*  
*Cloacibacterium*  
*Comamonas*  
*Conchiformibius*  
*Cryptobacterium*  
*Defluviitaleaceae\_UCG-011*  
*Delftia*  
*Dietzia*  
*Distigma*  
*Dolosigranulum*  
*Eikenella*  
*Enhydrobacter*  
*Enterococcus*  
*Erysipelotrichaceae\_UCG-006*  
*Escherichia/Shigella*  
*Ezakiella*  
*Fastidiosipila*  
*Filifactor*  
*Flavobacterium*  
*Fretibacterium*  
*Gardnerella*  
*Halomonas*



*Delftia unclassified*  
*Dialister microaerophilus*  
*Dietzia unclassified*  
*Dolosigranulum pigrum*  
*Eggerthia cateniformis*  
*Eikenella corrodens*  
*Enterococcus faecalis*  
*Eremothecium unclassified*  
*Escherichia coli*  
*Escherichia unclassified*  
*Eubacteriaceae bacterium CM5*  
*Eubacteriaceae noname unclassified*  
*Eubacterium infirmum*  
*Eubacterium saphenum*  
*Eubacterium yurii*  
*Facklamia unclassified*  
*Fingoldia magna*  
*Fretibacterium fastidiosum*  
*Fusobacterium periodonticum*  
*Gardnerella vaginalis*  
*Gemella unclassified*  
*Haemophilus aegyptius*  
*Haemophilus haemolyticus*  
*Haemophilus parahaemolyticus*  
*Haemophilus paraphrohaemolyticus*  
*Haemophilus sputorum*  
*Herbaspirillum unclassified*  
*Human herpesvirus 4*  
*Human herpesvirus 7*  
*Johnsonella ignava*  
*Jonquetella anthropi*  
*Jonquetella unclassified*  
*K1 polyomavirus*  
*Kingella denitrificans*  
*Kingella oralis*  
*Kingella unclassified*  
*Lachnospiraceae oral taxon 107*  
*Lactobacillus crispatus*  
*Lactobacillus phage J 1*  
*Lactobacillus phage Lc Nu*  
*Lactobacillus vaginalis*  
*Lautropia mirabilis*  
*Leptotrichia buccalis*  
*Helcococcus*  
*Herbaspirillum*  
*hgcl\_clade*  
*Howardella*  
*Hydrogenophaga*  
*Hymenobacter*  
*Janthinobacterium*  
*Johnsonella*  
*Jonquetella*  
*Kingella*  
*Klebsiella*  
*Lactococcus*  
*Lautropia*  
*Lawsonella*  
*Leuconostoc*  
*Mannheimia*  
*Megasphaera*  
*Mesorhizobium*  
*Methylobacillus*  
*Methylobacterium*  
*Microvirga*  
*Mitochondrion*  
*Mobiluncus*  
*Mogibacterium*  
*Moraxella*  
*Mycobacterium*  
*Olsenella*  
*Ornithobacterium*  
*Paracoccus*  
*Parascardovia*  
*Pelomonas*  
*Peptococcus*  
*Photobacterium*  
*Phyllobacterium*  
*Prevotellaceae\_YAB2003\_group*  
*Pseudopropionibacterium*  
*Pseudoramibacter*  
*Psychrobacter*  
*Ralstonia*  
*Ramlibacter*  
*Rheinheimera*  
*Rhizobium*  
*Rhodococcus*

|                                        |                                    |
|----------------------------------------|------------------------------------|
| <i>Leptotrichia goodfellowii</i>       | <i>Rikenellaceae_RC9_gut_group</i> |
| <i>Leptotrichia hofstadii</i>          | <i>Roseateles</i>                  |
| <i>Leptotrichia shahii</i>             | <i>Ruminococcaceae_UCG-014</i>     |
| <i>Leptotrichia unclassified</i>       | <i>Selenomonas</i>                 |
| <i>Leptotrichia wadei</i>              | <i>Senegalimassilia</i>            |
| <i>Lymphocryptovirus unclassified</i>  | <i>Shinella</i>                    |
| <i>Meyerozyma guilliermondii</i>       | <i>Slackia</i>                     |
| <i>Mitsuokella unclassified</i>        | <i>Sneathia</i>                    |
| <i>Mycobacterium avium</i>             | <i>Sphingomonas</i>                |
| <i>Naumovozya unclassified</i>         | <i>Sphingopyxis</i>                |
| <i>Neisseria elongata</i>              | <i>Streptobacillus</i>             |
| <i>Neisseria macacae</i>               | <i>Suttonella</i>                  |
| <i>Neisseria meningitidis</i>          | <i>Tannerella</i>                  |
| <i>Neisseria subflava</i>              | <i>Thermus</i>                     |
| <i>Olsenella unclassified</i>          | <i>Thioalkalispira</i>             |
| <i>Oribacterium sp ACB1</i>            | <i>Ureaplasma</i>                  |
| <i>Oribacterium sp oral taxon 078</i>  | <i>Weissella</i>                   |
| <i>Parvimonas sp oral taxon 110</i>    | <i>Xanthomonas</i>                 |
| <i>Peptoniphilus harei</i>             | <i>Yersinia</i>                    |
| <i>Peptoniphilus sp oral taxon 836</i> |                                    |
| <i>Porcine type C oncovirus</i>        |                                    |
| <i>Porphyromonas asaccharolytica</i>   |                                    |
| <i>Porphyromonas catoniae</i>          |                                    |
| <i>Porphyromonas uenonis</i>           |                                    |
| <i>Prevotella baroniae</i>             |                                    |
| <i>Prevotella bivia</i>                |                                    |
| <i>Prevotella buccae</i>               |                                    |
| <i>Prevotella dentalis</i>             |                                    |
| <i>Prevotella intermedia</i>           |                                    |
| <i>Prevotella loescheii</i>            |                                    |
| <i>Prevotella marshii</i>              |                                    |
| <i>Prevotella micans</i>               |                                    |
| <i>Prevotella saccharolytica</i>       |                                    |
| <i>Prevotella sp oral taxon 473</i>    |                                    |
| <i>Propionibacterium acnes</i>         |                                    |
| <i>Propionibacterium phage P100D</i>   |                                    |
| <i>Propionibacterium phage P101A</i>   |                                    |
| <i>Propionibacterium phage PAD20</i>   |                                    |
| <i>Pseudomonas geniculata</i>          |                                    |
| <i>Pseudomonas phage F116</i>          |                                    |
| <i>Pseudomonas unclassified</i>        |                                    |
| <i>Pseudoramibacter alactolyticus</i>  |                                    |
| <i>Pusillimonas unclassified</i>       |                                    |

*Ralstonia pickettii*  
*Riemerella unclassified*  
*Roseolovirus unclassified*  
*Ruminococcus torques*  
*Saccharomyces cerevisiae*  
*Scardovia unclassified*  
*Selenomonas artemidis*  
*Selenomonas flueggei*  
*Selenomonas noxia*  
*Selenomonas sputigena*  
*Serratia marcescens*  
*Slackia exigua*  
*Slackia unclassified*  
*Staphylococcus hominis*  
*Staphylococcus phage PVL*  
*Staphylococcus warneri*  
*Streptococcus agalactiae*  
*Streptococcus cristatus*  
*Streptococcus massiliensis*  
*Streptococcus oligofermentans*  
*Streptococcus phage Cp 1*  
*Streptococcus pseudopneumoniae*  
*Streptococcus sp F0442*  
*Subdoligranulum unclassified*  
*Tannerella forsythia*  
*Thiomonas unclassified*  
*Torque teno virus*  
*Treponema denticola*  
*Treponema maltophilum*  
*Treponema medium*  
*Treponema socranskii*  
*Treponema vincentii*  
*Ureaplasma unclassified*  
*Ureaplasma urealyticum*  
*Veillonella dispar*  
*Veillonella sp 3 1 44*  
*Veillonella sp 6 1 27*  
*Veillonella sp oral taxon 780*

- 1
- 2
- 3 **File S2.** Code used to determine differentially abundant taxa and functional categories
- 4
- 5 #load required packages

```

6 library(stringr)
7 library(ALDEx2)
8 library(ggpubr)
9 library(vegan)
0 library(compositions)
1 library(randomForest)
2 library(zCompositions)
3 library(rfUtilities)
4 library(MASS)
5 library(caret)
6 set.seed(100)
7
8 #####
9 #Aldex2 Calculations-ID's taxa/KOs significantly different between groups#
0 #Here I'm using the comparison of samples before/after TIP as an example##
1 #####
2 #Make a vector noting which samples were collected on vs. off antibiotic
3 #"Meta_ag_count_round" is a table with samples as columns and taxa as rows
4 Week <- str_extract(colnames(Meta_ag_count_round[1:157]), "S\\d{1,2}")
5 Abx <- as.factor(ifelse(Week %in% c("S0", "S5"), "A", "B"))
6 #make Species designations rownames (makes output of aldex easier to interpret)
7 rownames(Meta_ag_count_round) <- Meta_ag_count_round$Species
8 #perform Aldex2 calculation to ID significantly different taxa
9 x.all_abx <- aldex(
0   Meta_ag_count_round[,which(grepl("S0",colnames(Meta_ag_count_round))
1   |grepl("S1",colnames(Meta_ag_count_round)))],#only use Baseline and Week 1 samples
2
3   as.character(Abx[which(grepl("S0",colnames(Meta_ag_count_round))|grepl("S1",colnames(Meta_ag_count_r
4   ound)))]), #compare samples off vs. on Abx (A vs. B), using only baseline and week 1 samples
5   mc.samples=128, #number Monte Carlo samples to use to estimate distribution, this number is
6   recommended by aldex2 doc.
7   test="t", #Run Welch's t and Wilcoxin test
8   effect=TRUE, #print out effect sizes
9   include.sample.summary=FALSE) #don't include mean clr values for each sample
0
1 #order Species by effect size and extract those taxa with p value less than 0.05
2 x.all_abx <- x.all_abx[order(abs(x.all_abx$effect),decreasing = T),]
3 ald_abx <- rownames(x.all_abx)[which(x.all_abx$wi.eBH<0.05)] #wi.eBH is the wilcoxin rank sum test with a
4 benjamini hochbert correction for multiple comparisons
5
6 #####
7 #####PCoA using Aitchison Distance#####
8 #####Here using the PCoA from Fig. 3a as an example#####
9 #####
0 #first need to replace zeros using Bayesian-multiplicative replacement, bc Aitchison involves logs

```

```
1 tip_prop_zr <-
2 t(cmultRepl(as.data.frame(t(Meta_ag_count_round[,which(grepl("S0",colnames(Meta_ag_count_round))
3 |grepl("S1",colnames(Meta_ag_count_round)))])),method="CZM"))
4 #center log transform data and transpose
5 tip_prop_clr <- as.data.frame(clr(tip_prop_zr))
6 clr_t <- t(tip_prop_clr)
7
8 #create distance matrix. Aitchison distance is euclidean distance on centered log-transformed data
9 mod_dist <- vegdist(as.matrix(t(tip_prop_clr[,1:60])),method="euclidean")
0 #Make vector for samples collected on and off antibiotic
1 Week <-str_extract(colnames(tip_prop_clr[,1:60]),"S\\d{1,2}")
2 Abx <- as.factor(ifelse(Week %in% c("S0","S5"),"A","B"))
3 #Perform PERMANOVA using the Abx vector as a grouping variable
4 mod_perm <- adonis(clr_t~Abx, permutations=1000, method="euclidean")
5 mod_perm
6 #Homogeneity of Variance using Abx as grouping variable -> this also calculates coordinates for biplot
7 x<-betadisper(mod_dist, group=factor(Abx))
8 permutest(x)
9
0
```

## 1 SUPPLEMENTAL METHODS

### 2 Study design and Description of Subjects

3 The TIP study population comprised 30 people with CF who were spontaneously expectorating at three clinical  
4 sites, the University of Washington Medical Center, Seattle Children's Hospital and University of Michigan Health  
5 System. Spontaneously expectorated sputum was collected prospectively from these subjects at  
6 commencement of TIP ("baseline") and weekly during the month-long treatment period, which occurred after at  
7 least 28 days without exposure to any antibiotics other than maintenance azithromycin. A subset of participants  
8 also provided a follow-up sample one month after completion of the 28-day-long TIP treatment cycle ("follow-  
9 up"). Study inclusion criteria were as follows:

- 0 • Documented diagnosis of CF, based on standard criteria established by the Cystic Fibrosis Foundation
- 1 • Age > 6 years
- 2 • Able to reproducibly perform spirometry for clinical care
- 3 • Able to expectorate at least daily
- 4 • History of recurrent *P. aeruginosa* positive respiratory cultures, defined as 2 or more occurrences prior  
5 to enrollment
- 6 • Respiratory culture positive for *P. aeruginosa* at least once within the 12 months prior to enrollment
- 7 • Abstinence or documented use of contraception by females of child-bearing potential at baseline
- 8 • Signed informed consent, and assent, as applicable
- 9 • FEV<sub>1</sub> greater than 25% predicted at baseline

0 Study exclusion criteria were as follows:

- 1 • History of intolerance of inhaled tobramycin
- 2 • In the opinion of CF care provider, judged not to be able to tolerate 28 days without antibiotics other
- 3 than chronic azithromycin
- 4 • Treatment with any antibiotics (other than chronic azithromycin) within the prior 28 days to first sample
- 5 collection
- 6 • Initiation of chronic azithromycin within the prior 28 days of first sample collection
- 7 • Requiring hospitalization or treatment with antibiotics in addition to inhaled tobramycin during the study
- 8 period
- 9 • Positive urine or serum pregnancy test at baseline
- 0 • Participating in an investigational drug trial that is determined by the investigators to conflict with this
- 1 study's goals

2

3 Of the 30 participants recruited to the study, 4 did not complete the study: one was lost to follow up, one  
4 decided to leave the study early for unknown reasons, one did not tolerate tobramycin and was switched to  
5 alternative inhaled and oral antibiotics, one was started on intravenous antibiotics due to increased  
6 symptoms. We excluded all samples collected during periods of clinical instability requiring new antibiotics  
7 other than tobramycin. We chose these exclusion criteria to ensure all participants were clinically stable at  
8 the time of sample collection (limiting potential microbiota changes not attributable to antibiotic therapy).  
9 Sputum samples not collected during stability were excluded from the study.

0

### 1 **Sputum specimen processing**

2 All samples were shipped on ice within 48 hours of collection and sputum was homogenized with dithiothreitol to  
3 liquefy the specimen as described below. After culture, the remainder of the specimen was frozen for DNA  
4 analysis. Storage at 4C has been shown to preserve CF sputum microbiota profiles compared with -80C [3]. The  
5 48-hour window was chosen to allow participants to send in samples from home (maximizing recruitment in the  
6 study) as well as to allow samples to be available by mail from three different clinical sites in two cities,  
7 (University of Washington Medical Center, Seattle Children's Hospital and University of Michigan Health System),  
8 broadening generalizability. Sputum was also frozen in glycerol to allow for future culturing of non-canonical  
9 organisms where volume allowed. Subject details are present in Table S1.

0

### 1 **Sputum culture for standard pathogens**

2 An aliquot of each sample was cultured on differential media according to standard practice [4] to  
3 calculate total culturable loads of gram negative organisms (predominantly *P. aeruginosa*) and *S. aureus*. Viable  
4 loads of each taxon between baseline and Week 1 were compared using a paired Wilcoxon signed-rank sum  
5 test.

6

7

## 8 Initial sample processing and bacterial culture

9 All samples were either collected at a study visit followed by transfer to the lab or mailed directly the lab by the  
0 study participant on ice. An aliquot of each sample was cultured on differential media according to standard  
1 practice [4] to calculate total culturable loads of gram negative organisms and of *S. aureus* as follows. Samples  
2 were diluted 1:1 in 0.1% Sputolysin (DTT; Millipore Sigma), serially diluted in PBS and plated on blood agar  
3 (Fisher), MacConkey agar (BD) and mannitol salt agar (BD) according to standard practice [4]. Plates were  
4 incubated at 35°C for 24-48 hrs prior to quantifying the abundances of both *S. aureus* and select gram negative  
5 organisms (MacConkey agar, predominantly *P. aeruginosa* but counts also including *Achromobacter*  
6 *xylosoxidans*, *Stenotrophomonas maltophilia*, *Serratia marcescens* and an unidentified yeast taxon determined by  
7 microbiota analysis). Colonies on mannitol salt agar were confirmed as *S. aureus* either by mannitol fermentation  
8 or *nucA* PCR [5]. All colonies on MacConkey agar were counted as gram-negative organisms. Representative  
9 isolates were collected and frozen for future analysis.

0

## 1 Spirometry and symptom scores

2 Standard spirometric measures of lung function, including forced expiratory volume in 1 second (FEV<sub>1</sub>) and  
3 forced vital capacity (FVC), were recorded before and after therapy according to standard methods [6].  
4 Participants' subjective responses were collected before, during and one month after treatment, using the  
5 standardized Chronic Respiratory Infection Symptom Score (CRISS) [7], which quantifies symptoms such as  
6 cough and fatigue.

7

## 8 DNA extraction

9 All samples were extracted from frozen, DTT-treated sputum using a method designed to minimize human  
0 DNA and extracellular bacterial DNA as detailed previously [8]. 300-450mL of DTT-treated sputum was  
1 suspended in 7 mL dH<sub>2</sub>O and incubated at room temperature for one hour with gentle agitation. 10x strength  
2 Benzonase buffer (200 mM Tris-HCl, 10 mM MgCl<sub>2</sub>) to a final 1X and 250U Benzonase (Sigma E-1014) were  
3 added and the sample was incubated at 37°C for 2 h with gentle agitation. 1.5M NaCl (150 mM final) was  
4 added and the resulting solution was centrifuged at 8,000g for 10min and the pellet washed once with PBS,  
5 centrifuged at 13,000g for 4min, the pellet resuspended in 400µL TE, and 0.5M EDTA (5 mM final) was added  
6 to inactivate the endonuclease. A mixture of 1 mm and 0.1 mm silica:zirconia beads and a single tungsten-  
7 carbide bead was added to the TE solution, followed by bead-beating for one minute in a BioSpec  
8 MiniBeadBeater. The resulting solution was boiled for 5 min at 95°C. Lysozyme (Sigma L6876, 3 mg/mL final)  
9 and lysostaphin (Ambi LSPN, 0.14 mg/mL final) were added, and the sample was incubated for one hour at  
0 37°C. Proteinase K (Invitrogen 25530049, 1.4 mg/mL final) and SDS (1.8% final) were added, and the resulting  
1 solution incubated at 56°C for 30 min before cooling to room temperature. The solution was removed to a  
2 separate tube and 5 M NaCl was added (2 M final) before adding phenol:chloroform:isoamylalcohol (25:24:1)

3 at a 1:1 volume. The solution was then incubated for 20 min at room temperature, centrifuged at 13,000 g for  
4 20 min [17] and the top aqueous layer was collected. 0.133 volume equivalent of 7.5 M ammonium acetate  
5 was added to the aqueous layer, and the resulting solution diluted 1:1 with cold 100% ethanol to precipitate  
6 DNA. DNA product was cleaned with a spin column (BioBasic BS423, skipping the cell lysis steps and  
7 proceeding directly to DNA clean-up steps). Reagent blanks consisting of PBS alone were processed and  
8 sequenced via 16S amplicon sequencing to assess contamination.

9

## 0 **Quantitative PCR**

1 Total bacterial load was determined by universal 16S quantitative PCR with PowerUp SYBR Green Master mix  
2 (Applied Biosystems A25742) using previously published primers and reaction conditions [9]. Proportions of  
3 human and bacterial DNA in samples was determined by calculating the genome equivalents (GE) of each,  
4 using  $5 \times 10^6$  bp for the average microbial genome size. Based on the following commonly-used definition of  
5 limit of detection (LOD) for qPCR [10,11], “the lowest copy number associated with the serial dilution that gave  
6 a positive PCR response on 95% of occasions,” the LOD of our universal 16S qPCR assay was approximately  
7 8.24 GE per  $\mu$ L. In addition to all sputum samples, we calculated total bacterial loads of 12 extraction blanks.  
8 Average loads in extraction blanks were  $\sim 4$  logs lower than bacterial loads in samples and the lowest sample  
9 bacterial load was  $>2$  logs higher than the highest extraction blank bacterial load.

0 Taxon-specific qPCR was determined using previously published primers against the *femA* gene for *S.*  
1 *aureus* [12], the *gyrB* gene for *P. aeruginosa* [13] and genus-specific primers against the 16S genes for both  
2 *Streptococcus* [14] and *Prevotella* [15].

3 Data were analyzed with the Bio-Rad CFX Maestro 1.1 (Version 4.1.2434.0124), using software-  
4 defined Cq thresholds and total bacterial load between baseline and Week 1 was compared using a paired  
5 Wilcoxon signed-rank sum test.

6

## 7 **Phylogenetic composition from metagenomic shotgun sequencing**

8 Next-generation sequencing libraries were prepared for all samples using the Nextera DNA Sample Prep Kit  
9 (Illumina FC-121-1031) following manufacturer's instructions. All samples were sequenced on the Illumina  
0 HiSeq platform, producing an average of  $3.3 \times 10^7$  total reads per sample after quality filtering. Sequencing data  
1 from all samples were de-duplicated using SeqUniq (version 0.1) <https://github.com/standage/sequniq> and  
2 quality filtered using KneadData (version 0.6.1) and Trimmomatic (version 0.33) [16], producing an average of  
3  $2.9 \times 10^7$  reads per sample. Human reads, comprising 12%-95% of our samples based on the efficiency of the  
4 human DNA depletion step in our DNA extraction method, were identified and removed with BMTagger  
5 (version 3.101), resulting in  $1.3 \times 10^7$  microbial reads per sample on average. Due to the range of human DNA  
6 load across our samples, we were unable to use this diploid genome to normalize our microbial read  
7 abundances as has been proposed elsewhere [17]. Community phylogenetic composition was determined  
8 using MetaPhlan2 [18,19] (version 2.2.0) to produce a MetaPhlan2 taxa table. MetaPhlan2 utilizes a small set



9 of taxon-specific bacterial marker genes for taxonomic assignment and excludes genes from accessory  
0 genomic elements or paralogs, which cannot be reliably attributed to a specific taxon; thus it prioritizes  
1 specificity over sensitivity in contrast to other bioinformatic pipelines which determine the taxonomic origin of all  
2 reads. We utilized such a marker-gene approach for taxonomic designation to reduce the spurious detection of  
3 low-abundance taxa. [20–22] All commands were executed with default settings, with the exception of  
4 KneadData, which was used with the "--run-bmtagger" flag. For all samples, the *Achromobacter* genus  
5 represents reads originally annotated either as *Achromobacter* or *Bordetella*, the latter of which proved to  
6 reflect misidentified *Achromobacter* reads: Using mock communities, we found MetaPhlan2 consistently splits  
7 this taxon into *Achromobacter* and *Bordetella*, even when this latter taxon was not present, as confirmed by  
8 16S amplicon sequencing of the same samples [8].

9 As the lowest sample bacterial load was >2 logs higher than the highest extraction blank bacterial load,  
0 we pooled all taxa below 1% in an "other" category. Those taxa pooled into the other category are listed in File  
1 S1.

2

### 3 **Phylogenetic composition from 16S amplicon sequencing**

4 As a control for our metagenomic sequencing, we performed 16S amplicon sequencing (the most common  
5 microbiota sequencing method) for 155 out of the 157 study sputum samples as well as 12 extraction blank  
6 controls, one for each day of DNA extractions. The V4 region of the 16S rRNA gene was amplified using  
7 primers from the Earth Microbiome Project [18] and barcodes adapted from Kozich et al [23]. (detailed at  
8 [https://github.com/SchlossLab/MiSeq\\_WetLab\\_SOP/blob/master/MiSeq\\_WetLab\\_SOP\\_v4.md](https://github.com/SchlossLab/MiSeq_WetLab_SOP/blob/master/MiSeq_WetLab_SOP_v4.md)). 16S  
9 amplicons were made under the following conditions: 94°C for 3min, 30 cycles of the following sequence:  
0 [94°C for 45s, 50°C for 60s, 72°C for 90s], and then 72°C for 10min. Libraries were constructed by pooling  
1 equimolar amounts of each sample or of each blank at the volume of the least concentrated sample. Libraries  
2 were sequenced on the Illumina MiSeq platform producing paired 300 bp reads.

3 16S amplicon sequencing data were analyzed using the denoising program DADA2 [24] (version 1.6.0) and  
4 the complete code is listed in Supplementary File 1. Briefly, we computationally trimmed 10bp off the beginning  
5 of the both the forward and reverse reads and truncated the forward read to 200bp and the reverse read to  
6 100bp. We used our entire data set to define an error rate at each base pair and then denoised all sequences.  
7 Forward and reverse reads were merged and any pair without perfect overlap was removed. Finally, chimeric  
8 sequences were removed. This program produces a list of "Amplicon Sequence Variants" (ASV) analogous to  
9 OTUs generated with a 97% clustering method. Each ASV was annotated with the RDP Bayesian classifier  
0 [24] against the SILVA database [25] to produce a 16S amplicon taxa table. ASVs identified as *Pseudomonas*,  
1 *Staphylococcus* and *Achromobacter* were analyzed with BLASTn to determine species identity.

2 After quality filtering, sputum samples produced an average of 83,332 reads per sample, extraction blanks  
3 produced an average of 575 reads and amplicon blanks produced an average of 126 reads. Most reads in the  
4 blanks were taxa in common among samples with similar sequencing barcodes. As the absolute abundance of

5 these reads was 2-3 logs lower in blanks than in neighboring samples during sequencing, we found it unlikely  
6 they contributed to the taxonomic profiles of our samples, but that these reads were more likely due to errors in  
7 barcode reading [26,27]. The remaining taxa were those noted by Salter et al. to be common reagent  
8 contaminants [28] and were found at <1% relative abundance in samples. As the number of reads from blanks  
9 were substantially outnumbered by those detected in sputum samples, we did not analyze the reads from  
0 these controls further.

1 As the lowest sample bacterial load was >2 logs higher than the highest extraction blank bacterial load,  
2 we pooled all taxa below 1% in an “other” category. Those taxa pooled into the other category and those taxa  
3 identified in extraction blanks are listed in File S1. The phylogenetic profiles of extraction blanks and amplicon  
4 PCR no template controls are shown in Fig. S10.

5

### 6 **Microbiota composition analysis**

7 Analysis of ecological sputum microbiota composition was performed in R [29] (version 3.4.2) and visualized  
8 using ggplot2 [30] (version 2.2.1). For sputum samples, all taxa with <1% relative abundance in all samples or  
9 >1% relative abundance solely in extraction blanks were pooled into the “Other” category, as the largest  
0 difference in bacterial loads between samples and extraction blanks was 2 logs.

1 As MetaPhlan2 output data are expressed as proportions, we multiplied the proportion of each taxon in a  
2 sample by that sample’s total number of microbial reads, and rounded to the nearest integer value, to obtain  
3 calculated absolute number of reads per sample contributed by each taxon. Pseudocounts were added to all  
4 reads using the cmultRepl function in the zCompositions [31] package to remove zero values, and a centered  
5 log transformation using the clr function was then performed in the compositions package [32]. PERMANOVA  
6 calculations and PCA plots using Euclidean distance of transformed data were performed using the adonis  
7 function in the vegan package [33]. Homogeneity of variance was calculated and PCA coordinates determined  
8 using the betadisper function in the vegan package. Differences in taxonomic abundances between sample  
9 groups were identified by paired Wilcoxon signed-rank test performed using the aldex function in the ALDEx2  
0 package, a probabilistic model that implements statistical testing using a Dirichlet distribution designed for  
1 compositional data [34,35]. Code for these analyses is presented in File S2.

2 Estimated absolute abundances for all taxa were calculated by multiplying relative abundance data, after  
3 addition of pseudocounts as detailed above, by the total bacterial load determined by universal 16S qPCR.  
4 Strain-level analysis of *P. aeruginosa* and *S. aureus* was performed using StrainPhlan2 [36] applied to  
5 metagenomic data, using default settings with the exception of setting the “--bootstrap\_raxml” flag to 999.

6

### 7 **Functional Metagenomic Analysis**

8 After quality filtering, all metagenomic sequencing reads were mapped to the Kyoto Encyclopedia of Genes  
9 and Genomes (KEGG) database [37] and normalized using MUSiCC [38], a computational program that uses  
0 single-copy genes to normalize functional abundances in each sample, as described previously [39]. Samples

1 were collapsed at the KEGG module level. All modules with a variance less than 0.2 and those present in less  
2 than 25% of samples were removed. All samples were processed in the same manner as taxonomic data as  
3 detailed above.

#### 5 **Statistical analysis: Comparison of changes in sputum microbiota and clinical outcome measures**

6 For a priori comparison of all microbial community characteristics to therapeutic response, we calculated  
7 change in ppFEV<sub>1</sub> and CRISS symptom score from baseline to week 4 for all subjects who had week 4 visits  
8 (26 subject total). To maximize analytical power, we treated subjective and objective clinical responses as  
9 continuous, rather than dichotomous, variables. Log-transformed viable counts of gram-negative organisms  
0 and *S. aureus*, and total bacterial load via 16S qPCR, both at baseline and change in these features from  
1 baseline to week 4, were compared to clinical outcomes using linear regression. Centered log transformation  
2 of relative abundance of all taxa, as detailed above, at baseline and change in each taxon from baseline to  
3 week 4 were compared to clinical outcomes using linear regression. Shannon diversity at baseline and change  
4 in this metric from baseline to week 4 were compared to clinical outcomes using linear regression. Each KEGG  
5 module as baseline was compared to clinical outcomes using EdgeR [40]. A Benjamini-Hochberg correction for  
6 multiple comparisons was performed for all analyses described above, and p-values smaller than 0.05 were  
7 considered significant. Relative abundances of all taxa, normalized abundances of functional groups and  
8 diversity metrics were compared to change in cultured viable count of *P. aeruginosa* and *S. aureus* from  
9 baseline to week 1 in the same manner.

- 1  
2 1 Enright PL, Beck KC, Sherrill DL. Repeatability of Spirometry in 18,000 Adult Patients. *American Journal*  
3 *of Respiratory and Critical Care Medicine* 2004;**169**:235–8. doi:10.1164/rccm.200204-347oc
- 4 2 Fuchs HJ, Borowitz DS, Christiansen DH, *et al.* Effect of aerosolized recombinant human DNase on  
5 exacerbations of respiratory symptoms and on pulmonary function in patients with cystic fibrosis. *New*  
6 *England Journal of Medicine* 1994;**331**:637–42.
- 7 3 Zhao J, Li J, Schloss PD, *et al.* Effect of sample storage conditions on culture-independent bacterial  
8 community measures in cystic fibrosis sputum specimens. *Journal of clinical microbiology* 2011;**49**:3717–  
9 8.
- 0 4 Saiman L, Siegel JD, LiPuma JJ, *et al.* Infection Prevention and Control Guideline for Cystic Fibrosis: 2013  
1 Update. *Infection Control & Hospital Epidemiology* 2014;**35**:S1–67. doi:10.1086/676882
- 2 5 Brakstad OG, Aasbakk K, Maeland JA. Detection of *Staphylococcus aureus* by polymerase chain reaction  
3 amplification of the nuc gene. *Journal of clinical microbiology* 1992;**30**:1654–60.
- 4 6 Szczesniak R, Heltshe SL, Stanojevic S, *et al.* Use of FEV1 in cystic fibrosis epidemiologic studies and  
5 clinical trials: A statistical perspective for the clinical researcher. 2017. doi:10.1016/j.jcf.2017.01.002
- 6 7 Goss CH, Edwards TC, Ramsey BW, *et al.* Patient-reported respiratory symptoms in cystic fibrosis. *Journal*  
7 *of Cystic Fibrosis* 2009;**8**:245–52. doi:10.1016/j.jcf.2009.04.003

- 8 8 Nelson MT, Pope CE, Marsh RL, *et al.* Human and Extracellular DNA Depletion for Metagenomic  
9 Analysis of Complex Clinical Infection Samples Yields Optimized Viable Microbiome Profiles. *Cell*  
0 *Reports* 2019;**26**:2227-2240. e5.
- 1 9 Nadkarni MA, Martin FE, Jacques NA, *et al.* Determination of bacterial load by real-time PCR using a  
2 broad-range (universal) probe and primers set. *Microbiology* 2002;**148**:257–66.
- 3 10 Burns M, Valdivia H. Modelling the limit of detection in real-time quantitative PCR. *European Food*  
4 *Research and Technology* 2007;**226**:1513–24. doi:10.1007/s00217-007-0683-z
- 5 11 Bustin SA, Benes V, Garson JA, *et al.* The MIQE Guidelines: Minimum Information for Publication of  
6 Quantitative Real-Time PCR Experiments. *Clinical Chemistry* 2009;**55**:611–22.  
7 doi:10.1373/clinchem.2008.112797
- 8 12 Johnson EJ, Zemanick ET, Accurso FJ, *et al.* Molecular Identification of Staphylococcus aureus in Airway  
9 Samples from Children with Cystic Fibrosis. *PLOS ONE* 2016;**11**:e0147643.  
0 doi:10.1371/journal.pone.0147643
- 1 13 Anuj SN, Whiley DM, Kidd TJ, *et al.* Identification of Pseudomonas aeruginosa by a duplex real-time  
2 polymerase chain reaction assay targeting the ecfX and the gyrB genes. *Diagnostic Microbiology and*  
3 *Infectious Disease* 2009;**63**:127–31. doi:10.1016/j.diagmicrobio.2008.09.018
- 4 14 Olson AB, Sibley CD, Schmidt L, *et al.* Development of Real-Time PCR Assays for Detection of the  
5 Streptococcus milleri Group from Cystic Fibrosis Clinical Specimens by Targeting the cpn60 and 16S  
6 rRNA Genes. *Journal of Clinical Microbiology* 2010;**48**:1150–60. doi:10.1128/jcm.02082-09
- 7 15 Martin FE, Nadkarni MA, Jacques NA, *et al.* Quantitative microbiological study of human carious dentine  
8 by culture and real-time PCR: association of anaerobes with histopathological changes in chronic pulpitis.  
9 *Journal of clinical microbiology* 2002;**40**:1698–704.
- 0 16 Bolger AM, Lohse M, Usadel B. Trimmomatic: a flexible trimmer for Illumina sequence data.  
1 *Bioinformatics* 2014;**30**:2114–20. doi:10.1093/bioinformatics/btu170
- 2 17 Chouvarine P, Wiehlmann L, Losada PM, *et al.* Filtration and normalization of sequencing read data in  
3 whole-metagenome shotgun samples. *PLoS one* 2016;**11**.
- 4 18 Thompson LR, Sanders JG, McDonald D, *et al.* A communal catalogue reveals Earth’s multiscale microbial  
5 diversity. *Nature* 2017;**551**:457 EP-.
- 6 19 Truong DT, Franzosa EA, Tickle TL, *et al.* MetaPhlan2 for enhanced metagenomic taxonomic profiling.  
7 *Nat Methods* 2015;**12**:902–3. doi:10.1038/nmeth.3589
- 8 20 Simon HY, Siddle KJ, Park DJ, *et al.* Benchmarking metagenomics tools for taxonomic classification. *Cell*  
9 2019;**178**:779–94.
- 0 21 Teo YV, Neretti N. A comparative study of metagenomics analysis pipelines at the species level. *bioRxiv*  
1 2016;:081141.
- 2 22 Tamames J, Cobo-Simón M, Puente-Sánchez F. Assessing the performance of different approaches for  
3 functional and taxonomic annotation of metagenomes. *BMC genomics* 2019;**20**:1–16.

- 4 23 Kozich JJ, Westcott SL, Baxter NT, *et al.* Development of a Dual-Index Sequencing Strategy and Curation  
5 Pipeline for Analyzing Amplicon Sequence Data on the MiSeq Illumina Sequencing Platform. *Applied and*  
6 *Environmental Microbiology* 2013;**79**:5112–20. doi:10.1128/aem.01043-13
- 7 24 Wang Q, Garrity GM, Tiedje JM, *et al.* Naive Bayesian Classifier for Rapid Assignment of rRNA  
8 Sequences into the New Bacterial Taxonomy. *Applied and Environmental Microbiology* 2007;**73**:5261–7.  
9 doi:10.1128/aem.00062-07
- 0 25 Quast C, Pruesse E, Yilmaz P, *et al.* The SILVA ribosomal RNA gene database project: improved data  
1 processing and web-based tools. *Nucleic Acids Research* 2013;**41**:D590–6. doi:10.1093/nar/gks1219
- 2 26 Kircher M, Sawyer S, Meyer M. Double indexing overcomes inaccuracies in multiplex sequencing on the  
3 Illumina platform. *Nucleic Acids Research* 2012;**40**:e3–e3. doi:10.1093/nar/gkr771
- 4 27 Sinclair L, Osman OA, Bertilsson S, *et al.* Microbial Community Composition and Diversity via 16S rRNA  
5 Gene Amplicons: Evaluating the Illumina Platform. *PLoS ONE* 2015;**10**:e0116955.  
6 doi:10.1371/journal.pone.0116955
- 7 28 Salter SJ, Cox MJ, Turek EM, *et al.* Reagent and laboratory contamination can critically impact sequence-  
8 based microbiome analyses. *BMC biology* 2014;**12**:1.
- 9 29 R Core Team. *R: A Language and Environment for Statistical Computing*. Vienna, Austria: 2017.  
0 <https://www.R-project.org/>
- 1 30 Wickham H. *ggplot2: Elegant Graphics for Data Analysis*. Springer-Verlag New York 2009.  
2 <http://ggplot2.org>
- 3 31 Palarea-Albaladejo J, Martín-Fernández JA. zCompositions—R package for multivariate imputation of left-  
4 censored data under a compositional approach. *Chemometrics and Intelligent Laboratory Systems*  
5 2015;**143**:85–96.
- 6 32 van den Boogaart KG, Tolosana-Delgado R. “Compositions”: a unified R package to analyze compositional  
7 data. *Computers & Geosciences* 2008;**34**:320–38.
- 8 33 Oksanen J, Blanchet FG, Friendly M, *et al.* *vegan: Community Ecology Package*. 2017. [https://CRAN.R-](https://CRAN.R-project.org/package=vegan)  
9 [project.org/package=vegan](https://CRAN.R-project.org/package=vegan)
- 0 34 Fernandes AD, Reid JN, Macklaim JM, *et al.* Unifying the analysis of high-throughput sequencing datasets:  
1 characterizing RNA-seq, 16S rRNA gene sequencing and selective growth experiments by compositional  
2 data analysis. *Microbiome* 2014;**2**:15.
- 3 35 Fernandes AD, Macklaim JM, Linn TG, *et al.* ANOVA-like differential expression (ALDEx) analysis for  
4 mixed population RNA-Seq. *PLoS One* 2013;**8**:e67019.
- 5 36 Truong DT, Tett A, Pasolli E, *et al.* Microbial strain-level population structure and genetic diversity from  
6 metagenomes. *Genome research* 2017;**27**:626–38.
- 7 37 Kanehisa M, Goto S, Sato Y, *et al.* KEGG for integration and interpretation of large-scale molecular data  
8 sets. *Nucleic Acids Research* 2012;**40**:D109–14. doi:10.1093/nar/gkr988

- 9 38 Manor O, Borenstein E. MUSiCC: a marker genes based framework for metagenomic normalization and  
0 accurate profiling of gene abundances in the microbiome. *Genome Biology* 2015;**16**. doi:10.1186/s13059-  
1 015-0610-8
- 2 39 Manor O, Levy R, Pope CE, *et al.* Metagenomic evidence for taxonomic dysbiosis and functional imbalance  
3 in the gastrointestinal tracts of children with cystic fibrosis. *Scientific reports* 2016;**6**:22493.  
4 doi:10.1038/srep22493
- 5 40 Robinson MD, McCarthy DJ, Smyth GK. edgeR: a Bioconductor package for differential expression  
6 analysis of digital gene expression data. *Bioinformatics (Oxford, England)* 2010;**26**:139–40.  
7 doi:10.1093/bioinformatics/btp616

8

9

0

1
